# Supplementary material for: High-temperature redox chemistry of Pr0.5Sr1.5Cr0.5Mn0.5O4−δ investigated in situ by neutron diffraction and X-ray absorption spectroscopy under reducing and oxidizing gas flows
Source: Royal Society of Chemistry journal article supplement (doi:10.1039/c2jm31448g), 2012-01-01
Supplement: c2jm31448g.pdf [file c2jm31448g.pdf]

## Supporting Information for:

### High temperature redox chemistry of

$\text{Pr}_{0.5}\text{Sr}_{1.5}\text{Cr}_{0.5}\text{Mn}_{0.5}\text{O}_{4-\delta}$  investigated *in situ* by neutron

diffraction and X-ray absorption spectroscopy under

reducing and oxidizing gas flows

M. Bahout<sup>1\*</sup>, F. Tonus<sup>1</sup>, C. Prestipino<sup>1</sup>, D. Pelloquin<sup>2</sup>, T. Hansen<sup>3</sup>, E. Fonda<sup>4</sup> and P. D. Battle<sup>5\*</sup>

<sup>1</sup>Institut Sciences Chimiques de Rennes, UMR 6226 CNRS-Université Rennes 1, Campus de Beaulieu, Avenue du Général Leclerc, 35042 Rennes, France

<sup>2</sup>CRISMAT Laboratory, UMR6508 – Ensicaen, 6, boulevard du maréchal Juin, 14050 Caen cedex, France

<sup>3</sup>Institut Laue-Langevin, 6, rue Jules Horowitz 38042 Grenoble Cedex, France

<sup>4</sup>SOLEIL, L'Orme des Merisiers, Saint-Aubin - BP 48, 91192 Gif-sur-Yvette, France

<sup>5</sup>Inorganic Chemistry Laboratory, University of Oxford, South Parks Road, Oxford, OX1 3QR, U. K.

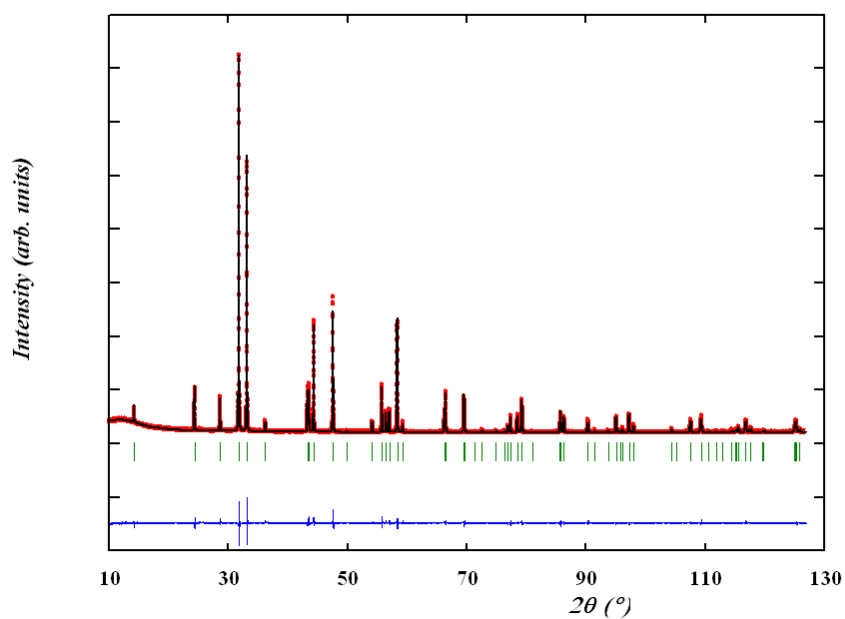

(a)

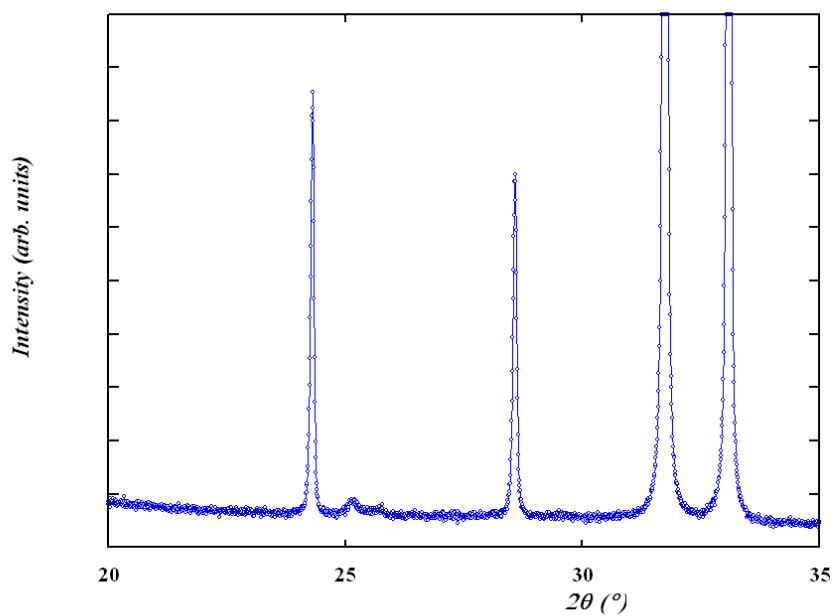

(b)

**Fig. S1** (a) Rietveld-fitted X-ray diffraction of as-prepared  $\text{Pr}_{0.5}\text{Sr}_{1.5}\text{Cr}_{0.5}\text{Mn}_{0.5}\text{O}_4$  (sample I) and (b) zoom of the low angle region showing the presence of  $\text{SrCO}_3$  secondary phase with its maximum intensity at  $2\theta \approx 25^\circ$ .

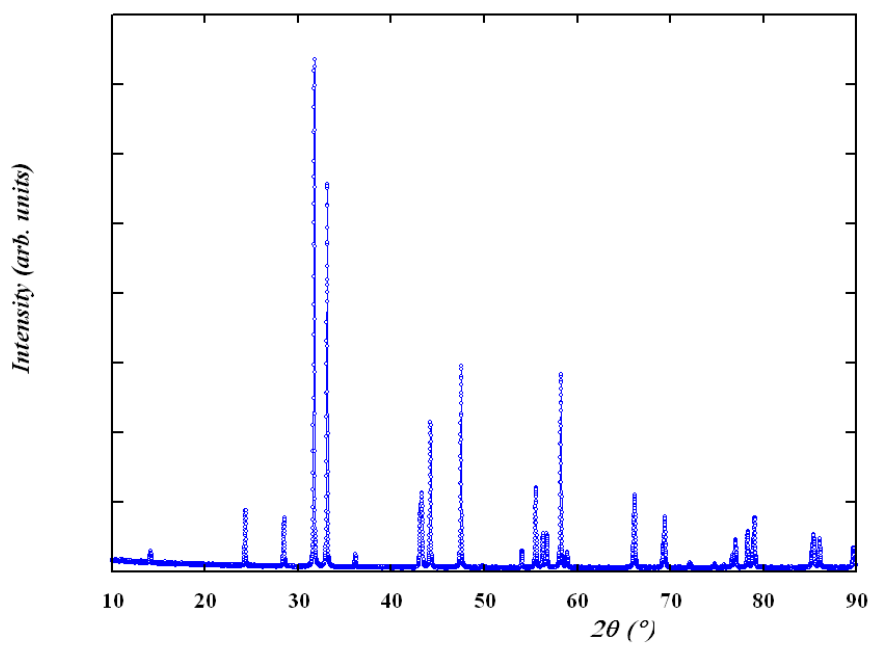

(a)

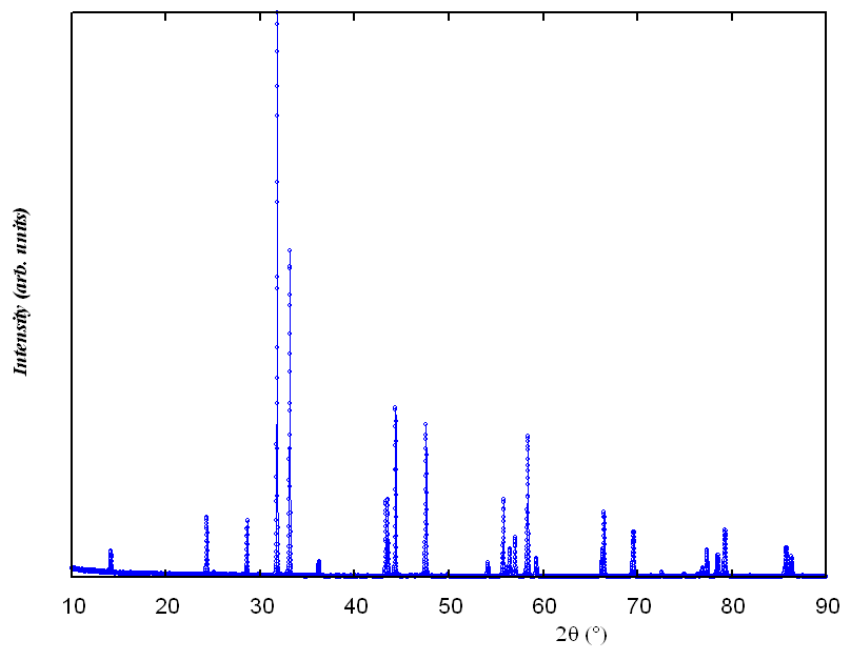

(b)

Fig. S2 X-ray powder diffraction pattern of (a) sample II, (b) sample III.



**Table S1:** Results on the principal component analysis of Mn K-edge spectra collected on heating  $\text{Pr}_{0.5}\text{Sr}_{1.5}\text{Cr}_{0.5}\text{Mn}_{0.5}\text{O}_{4-\delta}$  under a flow of 5%  $\text{H}_2$ -He.

| Component | eigenvalue  | IND         | REV Significance Level | DRMAD |
|-----------|-------------|-------------|------------------------|-------|
| 1         | 5.53515e+04 | 1.22657e-06 | 0.0                    | 0     |
| 2         | 6.38318e-01 | 9.88310e-07 | 0.002                  | 1     |
| 3         | 6.52355e-02 | 9.92480e-07 | 13.94                  | 1     |
| 4         | 3.12483e-02 | 1.01480e-06 | 29.95                  | 1     |
| 5         | 2.68563e-02 | 1.04035e-06 | 33.21                  | 1     |
| 6         | 2.49004e-02 | 1.06800e-06 | 34.70                  | 1     |
| 7         | 2.43372e-02 | 1.09702e-06 | 34.92                  | 1     |
| 8         | 2.24722e-02 | 1.12848e-06 | 36.53                  | 1     |
| 9         | 2.15070e-02 | 1.16196e-06 | 37.31                  | 1     |
| 10        | 2.12400e-02 | 1.19707e-06 | 37.34                  | 1     |

The table lists the first ten eigenvalues and the corresponding indicator functions. Algorithms to define the significance level of the REV function, together with the IND and DRMAD functions are defined in reference [38] and references therein.
